# Supplementary material
Source: PubMed Central journal article supplement (PMC10598481)
Supplement: NIHMS1936970-supplement-Lorenzo_et_al__Nat_Rev__2023_Supp_1.pdf [file NIHMS1936970-supplement-Lorenzo_et_al__Nat_Rev__2023_Supp_1.pdf]

# Spectrins: molecular organizers and targets of neurological disorders

In the format provided by the authors and unedited

**Supplementary Table 1. Mouse models of spectrinopathies of the nervous system**

| Gene                               | Genotype | Cre recombinase or specific promoter | Expression                                                                                                               | Lethality            | Cortical and hippocampal morphology                                                  | Cerebellar morphology                                                | Developmental Delay      | Hyperactivity | Seizure              | Motor deficits                                | Social deficits | Sensory and auditory function | Synaptic function | Other findings                                                             | Refs    |
|------------------------------------|----------|--------------------------------------|--------------------------------------------------------------------------------------------------------------------------|----------------------|--------------------------------------------------------------------------------------|----------------------------------------------------------------------|--------------------------|---------------|----------------------|-----------------------------------------------|-----------------|-------------------------------|-------------------|----------------------------------------------------------------------------|---------|
| <b>Global knockout</b>             |          |                                      |                                                                                                                          |                      |                                                                                      |                                                                      |                          |               |                      |                                               |                 |                               |                   |                                                                            |         |
| <i>Sptan1</i>                      | -/-      | None                                 | Global                                                                                                                   | E12.5-E16.5          | +                                                                                    | U                                                                    | In utero growth delay    | N/A           | N/A                  | N/A                                           | N/A             | N/A                           | N/A               | Craniofacial, neural tube, and cardiac anomalies                           | 92      |
| <i>Sptan1</i>                      | +/-      | None                                 | Global                                                                                                                   | live 24 mo           | -                                                                                    | U                                                                    | -                        | U             | U                    | U                                             | U               | U                             | U                 |                                                                            | 92      |
| <i>Sptbn1<sup>Eif</sup></i>        | -/-      | None                                 | Global                                                                                                                   | E8.5-E16.5           | U                                                                                    | N/A                                                                  | In utero growth delay    | N/A           | N/A                  | N/A                                           | N/A             | N/A                           | N/A               | Craniofacial, brain, liver, gut and cardiac anomalies                      | 99      |
| <i>Sptbn2</i>                      | -/-      | None                                 | Global                                                                                                                   | live 24 mo           | -                                                                                    | Progressive ML thinning, PC loss                                     | -                        | U             | U                    | Progressive motor deficits, tremors           | U               | U                             | +                 | Hypomorph                                                                  | 104     |
| <i>Sptbn2</i>                      | -/-      | None                                 | Global                                                                                                                   | live > 18 mo         | U                                                                                    | ML thinning, PC degeneration, PSD deficits                           | -                        | -             | Myoclonic seizures   | Motor deficits                                | U               | U                             | +                 | Hypomorph                                                                  | 72      |
| <i>Sptbn2</i>                      | +/-      | None                                 | Global                                                                                                                   | live 24 mo           | U                                                                                    | -                                                                    | -                        | U             | U                    | -                                             | U               | U                             | U                 |                                                                            | 104     |
| <i>Sptbn2</i>                      | +/-      | None                                 | Global                                                                                                                   | live > 18 mo         | U                                                                                    | -                                                                    | -                        | U             | -                    | Deficits in the wire-hang test                | U               | U                             | U                 | Express a truncated fragment                                               | 72      |
| <i>Sptbn4</i>                      | -/-      | None                                 | Global loss of full length Sptbn4 $\Sigma$ I and Sptbn4 $\Sigma$ VI. Might express N-terminal Sptbn4 $\Sigma$ I products | live 6-10 mo         | U                                                                                    | Impaired molecular clustering at the AIS of PC                       | U                        | U             | U                    | Tremors, hind limb contraction and paralysis  | U               | U                             | U                 | Deficits in NoR organization                                               | 54      |
| <i>Sptbn4 <math>\Sigma</math>I</i> | -/-      | None                                 | Global                                                                                                                   | live > 15 mo         | U                                                                                    | Impaired molecular clustering at the AIS of PC                       | U                        | U             | U                    | Juvenile tremors, gait and hind limb deficits | U               | Auditory deficits             | U                 | Deficits in NoR organization, impaired sexual behavior in males            | 51, 116 |
| <i>Sptbn5</i>                      | -/-      | None                                 | Global                                                                                                                   | U, tested up to 2 mo | U                                                                                    | U                                                                    | U                        | U             | U                    | U                                             | U               | Auditory deficits             | U                 | Reduction in SGN efferent and afferent fibers and in ABR wave 1 amplitudes | 119     |
| <b>Conditional knockout</b>        |          |                                      |                                                                                                                          |                      |                                                                                      |                                                                      |                          |               |                      |                                               |                 |                               |                   |                                                                            |         |
|                                    | fl/fl    | <i>Nestin</i>                        | Neural precursors in the CNS                                                                                             | <20 days             | Disrupted cortical lamination and AIS development. Deficits in dendritic development | Fewer PC with disrupted AIS and altered dendrites axonal projections | Significant growth delay | U             | generalized seizures | U                                             | U               | U                             | +                 | CNS neurodegeneration                                                      | 52      |

|                                                             |       |                 |                              |                        |                                                                                      |                                                 |                          |   |                      |                                                                                          |                                                                     |                                                                                |                                       |                                                                                            |                                                |     |
|-------------------------------------------------------------|-------|-----------------|------------------------------|------------------------|--------------------------------------------------------------------------------------|-------------------------------------------------|--------------------------|---|----------------------|------------------------------------------------------------------------------------------|---------------------------------------------------------------------|--------------------------------------------------------------------------------|---------------------------------------|--------------------------------------------------------------------------------------------|------------------------------------------------|-----|
| <i>Sptan1</i> <sup>fl/fl</sup>                              | fl/fl | <i>Advillin</i> | PNS sensory neurons          | live > 6 mo            | U                                                                                    | U                                               | -                        | U | U                    | Juvenile hindlimb clasping reflex, severe ataxia, impaired performance in wire-hang test | U                                                                   | Reduced conduction velocity of large diameter PNS sensory axons                | U                                     | Deficits in NoR organization. Degeneration of large-diameter, myelinated PNS sensory axons | 68                                             |     |
| <i>Sptbn</i> <sup>null</sup>                                | fl/fl | <i>Nestin</i>   | Neural precursors in the CNS | U, tested up to 3 mo   | -                                                                                    | -                                               | -                        | U | -                    | -                                                                                        | U                                                                   | -                                                                              | -                                     | -                                                                                          | 58, 64                                         |     |
|                                                             | fl/fl | <i>Advillin</i> | PNS sensory neurons          | U, tested up to 1.5 mo | U                                                                                    | U                                               | -                        | U | -                    | -                                                                                        | U                                                                   | -                                                                              | -                                     | -                                                                                          | 64                                             |     |
| <i>Sptbn1</i> <sup>null</sup>                               | fl/fl | <i>Nestin</i>   | Neural precursors in the CNS | <40 days               | CC agenesis, loss of long-range axons, disrupted cortical lamination, AIS deficits   | Loss of cerebellar white matter and projections | Significant growth delay | + | Generalized seizures | Severe ataxia with tremors, hindlimb clasping reflex, absence of rears                   | U                                                                   | U                                                                              | Reduced cortical dendritic complexity | Facial dysmorphism                                                                         | 41, 42                                         |     |
|                                                             | fl/+  |                 |                              | live > 9 mo            | CC dysgenesis, reduction in long-range axons, mild disruption in cortical lamination |                                                 |                          |   |                      |                                                                                          |                                                                     |                                                                                |                                       |                                                                                            |                                                | U   |
|                                                             | fl/fl | <i>Nex</i>      | Forebrain excitatory neurons | <160 days              | CC dysgenesis, reduction in long-range axons                                         | U                                               | Growth delay             | U | U                    | U                                                                                        | U                                                                   | U                                                                              | U                                     | U                                                                                          | 42                                             |     |
|                                                             |       |                 |                              | fl/+                   | live > 12 mo                                                                         | CC dysgenesis, reduction in long-range axons    | U                        | - | U                    | U                                                                                        | U                                                                   | U                                                                              | U                                     | U                                                                                          |                                                |     |
|                                                             | fl/fl | <i>Advillin</i> | PNS sensory neurons          | live > 4 mo            | U                                                                                    | U                                               | U                        | U | U                    | U                                                                                        | Motor coordination deficits, hindlimb clasping reflex, reduced grip | U                                                                              | Normal thermal nociception            | U                                                                                          | Deficits in NoR paranodes                      | 67  |
|                                                             | fl/fl | <i>Atoh1</i>    | Auditory hair cells          | live > 9 mo            | U                                                                                    | U                                               | U                        | U | U                    | U                                                                                        | U                                                                   | U                                                                              | Juvenile auditory deficits            | U                                                                                          | Disorganized rootlet region of HC stereocilium | 100 |
| <i>Sptbn4</i> <sup>null</sup>                               | fl/fl | <i>Nestin</i>   | Neural precursors in the CNS | live > 3 mo            | Disrupted cortical AIS organization                                                  | U                                               | U                        | U | U                    | Motor coordination deficits, tremors                                                     | U                                                                   | U                                                                              | U                                     | Intact Na <sub>v</sub> clustering at CNS NoR                                               | 58                                             |     |
|                                                             | fl/fl | <i>Advillin</i> | PNS sensory neurons          | live > 3 mo            | U                                                                                    | U                                               | U                        | U | U                    | -                                                                                        | U                                                                   | -                                                                              | U                                     | Intact Na <sub>v</sub> clustering at PNS NoR                                               | 64                                             |     |
| <i>Sptbn4</i> <sup>null</sup> ; <i>Sptb</i> <sup>null</sup> | fl/fl | <i>Nestin</i>   | Neural precursors in the CNS | live > 3 mo            | Disrupted cortical AIS and CC NoR organization                                       | U                                               | U                        | U | Generalized seizures | Severe motor impairment                                                                  | U                                                                   | U                                                                              | U                                     | Gradual loss of Na <sub>v</sub> clustering at CNS NoR                                      | 58                                             |     |
|                                                             | fl/fl | <i>Advillin</i> | PNS sensory neurons          | live > 9 mo            | U                                                                                    | U                                               | U                        | U | Generalized seizures | Hindlimb clasping reflex                                                                 | U                                                                   | Severe defects in proprioception. Compromised myelinated sensory axon function | U                                     | Gradual loss of Na <sub>v</sub> clustering at PNS NoR and axon degeneration                | 64                                             |     |
| <b>Knock-in</b>                                             |       |                 |                              |                        |                                                                                      |                                                 |                          |   |                      |                                                                                          |                                                                     |                                                                                |                                       |                                                                                            |                                                |     |

|                                       |                                                |                                                           |        |                          |                                                                                                                 |                                                                                          |                     |   |                                        |                                                                                                                           |                                 |                                                         |                                                                      |                                                                                                                     |                                               |    |
|---------------------------------------|------------------------------------------------|-----------------------------------------------------------|--------|--------------------------|-----------------------------------------------------------------------------------------------------------------|------------------------------------------------------------------------------------------|---------------------|---|----------------------------------------|---------------------------------------------------------------------------------------------------------------------------|---------------------------------|---------------------------------------------------------|----------------------------------------------------------------------|---------------------------------------------------------------------------------------------------------------------|-----------------------------------------------|----|
| <i>Sptan1</i> <sup>R1098Q</sup>       | <i>Sptan1</i> <sup>R1098Q/R1098Q</sup>         | None                                                      | Global | E18                      | Craniofacial and vascular defects                                                                               | U                                                                                        | U                   | U | U                                      | U                                                                                                                         | U                               | U                                                       | U                                                                    | U                                                                                                                   | Presence of calpain-cleaved spectrin products | 97 |
|                                       | <i>Sptan1</i> <sup>R1098Q/+</sup>              | None                                                      | Global | live 24 mo               | Neuronal loss and reactive gliosis in the cortex and hippocampus                                                | Profound progressive atrophy of the cerebellum with gliosis, degeneration and loss of PC | U                   | U | Seizures observed in older ataxic mice | Progressive ataxia with tremors                                                                                           | Ataxic mice are more aggressive | U                                                       | Loss of PC. Severe loss of PC dendrites with fragmentation           | Enhanced calpain activation and calpain-cleaved spectrin                                                            | 97                                            |    |
| <i>Sptbn2</i> <sup>E532_M544del</sup> | <i>Sptbn2</i> <sup>E532_M544del/+</sup>        | Express <i>Pcp2</i> TTA and TRE- <i>Sptbn2</i> transgenes | PC     | live > 18 mo             | U                                                                                                               | Loss of PC dendrites. Decreased cerebellar NAA levels                                    | -                   | U | -                                      | Progressive motor coordination impairments                                                                                | U                               | U                                                       | Loss of mGluR1α clustering at PC spines. Loss of mGluR1-mediated LTP | 74                                                                                                                  |                                               |    |
| <i>Sptbn4</i> <sup>qv-1</sup>         | <i>Sptbn4</i> <sup>R2079*/R2079*</sup>         | None                                                      | Global | < 5 months               | U                                                                                                               | U                                                                                        | U                   | U | U                                      | Progressive ataxia with tremors. Hindlimb paralysis observed in 1 mo mice                                                 | U                               | Deafness                                                | U                                                                    | Eye infections                                                                                                      | 114                                           |    |
| <i>Sptbn4</i> <sup>qv-2j</sup>        | <i>Sptbn4</i> <sup>R1676fs*35/R1676fs*35</sup> | None                                                      | Global | U                        | U                                                                                                               | U                                                                                        | U                   | U | U                                      | U                                                                                                                         | U                               | Abnormal auditory brainstem response                    | U                                                                    | 114                                                                                                                 |                                               |    |
| <i>Sptbn4</i> <sup>qv-3j</sup>        | <i>Sptbn4</i> <sup>G2210fs*49/G2210fs*49</sup> | None                                                      | Global | < 5 months               | Abnormal morphology and Na <sub>v</sub> clustering at NoR in the CNS                                            | U                                                                                        | U                   | U | U                                      | Progressive ataxia with tremors, hindlimb clasping reflex, and quivering. Decreased locomotion or paralysis in older mice | U                               | Abnormal auditory brainstem response                    | U                                                                    | Infertility, mild morphological deficits in PNS NoR. Increased NF density and altered axon shape in the optic nerve | 114, 116, 117                                 |    |
| <i>Sptbn4</i> <sup>qv-4l</sup>        | <i>Sptbn4</i> <sup>Q1359*/Q1359*</sup>         | None                                                      | Global | Reduced, age of death NA | Disrupted CNS nodes of Ranvier                                                                                  | U                                                                                        | U                   | U | U                                      | U                                                                                                                         | U                               | Deafness                                                | U                                                                    | Disruption of NoR in the PNS                                                                                        | 114, 116                                      |    |
| <i>Sptbn4</i> <sup>qv-Ind</sup>       | <i>Sptbn4</i> <sup>A480fs*12/A480fs*12</sup>   | None                                                      | Global | 10 months                | U                                                                                                               | U                                                                                        | Decreased body size | U | U                                      | Progressive abnormalities of gait, juvenile head tremors, paralysis                                                       | U                               | Significantly reduced or absent auditory brain response | U                                                                    | Dystrophic axons in the low lumbar and sacral spinal cord levels. Male infertility                                  | 114                                           |    |
| <i>Sptbn4</i> <sup>qv-Ind2j</sup>     | <i>Sptbn4</i> <sup>R1675fs*35/A480fs*12</sup>  | None                                                      | Global | 4 weeks                  | Abnormal auditory cortex morphology. Disrupted myelination of auditory neuron axons and KCNA1 clustering at NoR | U                                                                                        | U                   | U | U                                      | U                                                                                                                         | U                               | Significantly reduced or absent auditory brain response | U                                                                    | 114                                                                                                                 |                                               |    |

ABBREVIATIONS: fl/+, floxed heterozygous; fl/fl, floxed homozygous; E, embryonic; U, unknown; ML, molecular layer of the cerebellum; PC, Purkinje cells; PSD, postsynaptic density; AIS, axon initial segment; CC, corpus callosum; NoR, nodes of Ranvier; -, no deficits detected; +, deficits detected; N/A, non-applicable; LTP, long-term potentiation; CNS, central nervous system; PNS, peripheral nervous system; NF, neurofilament; NAA, N-acetylaspartate; SGN, spiral ganglion neurons; ABR, auditory brainstem response.
