# Supplementary material
Source: PubMed Central journal article supplement (PMC10598481)
Supplement: NIHMS1936970-supplement-Lorenzo_et_al__Nat_Rev__2023_Supp_2.pdf [file NIHMS1936970-supplement-Lorenzo_et_al__Nat_Rev__2023_Supp_2.pdf]

**Supplementary Table 2. Spectrin genetic variants associated with neurological disorders.**

| <b>Gene</b>          | <b>Human variant</b> | <b>Refs</b>   |
|----------------------|----------------------|---------------|
| <b><i>SPTAN1</i></b> | R19W                 | 98            |
|                      | G91K                 | 124           |
|                      | R139*                | 94            |
|                      | G178D                | 130           |
|                      | A306V                | 130           |
|                      | R566P                | 122           |
|                      | A858S                | 133           |
|                      | S899C                | 137           |
|                      | A927_K1002del        | 130           |
|                      | R984*                | 135           |
|                      | R1098S               | 136           |
|                      | R1098C               | 98            |
|                      | H1239R               | 130           |
|                      | I1388V               | 134           |
|                      | A1428G               | 133           |
|                      | Q1539*               | 94            |
|                      | R1610W               | 130           |
|                      | D1616N               | 132           |
|                      | R1624C               | 98            |
|                      | R1776W               | 130           |
|                      | Q2035*               | 126, 128      |
|                      | R2062W               | 130           |
|                      | K2083del             | 98            |
|                      | V2123Cfs*45          | 96            |
|                      | Q2149*               | 94            |
|                      | N2186Rfs*82          | 136           |
|                      | Q2202del             | 122           |
|                      | Q2205P               | 98            |
|                      | E2207del             | 120, 130      |
|                      | N2208del             | 130           |
|                      | R2229_T2230insSALHR  | 135           |
|                      | R2261*               | 95            |
|                      | E2270del             | 121           |
|                      | E2271K               | 130           |
|                      | D2284del             | 130           |
|                      | D2303_L2305dup       | 122, 127, 130 |
|                      | D2303_L2305del       | 130, 136      |
|                      | Q2304_G2306del       | 130           |
|                      | Q2304_G2306dup       | 125           |

|               |                     |               |     |
|---------------|---------------------|---------------|-----|
|               | R2308_M2309dup      | 120, 130, 131 |     |
|               | Q2316P              | 129           |     |
|               | M2330I              | 133           |     |
| <b>SPTBN1</b> | T59I                | 42            |     |
|               | I159_Q160del        | 42            |     |
|               | C183*               | 42, 101       |     |
|               | c.567-2_584delins17 | 101           |     |
|               | Y190_R216del        | 42, 101       |     |
|               | G205S               | 42, 101       |     |
|               | G205D               | 42            |     |
|               | L247H               | 42            |     |
|               | L250R               | 42            |     |
|               | c.763+1G>A          | 101           |     |
|               | D255E               | 42            |     |
|               | T268S               | 42            |     |
|               | T268N               | 42            |     |
|               | T268A               | 42            |     |
|               | V271M               | 42            |     |
|               | H275R               | 42            |     |
|               | F344L               | 42            |     |
|               | R411W               | 42            |     |
|               | R411Q               | 42            |     |
|               | E491Q               | 42            |     |
|               | A850G               | 42            |     |
|               | E892*               | 42            |     |
|               | R1003W              | 42            |     |
|               | A1086T              | 42            |     |
|               | E1110D              | 42            |     |
|               | Y1303*              | 101           |     |
|               | G1398S              | 42            |     |
|               | S1674P              | 42            |     |
|               | W1787*              | 42            |     |
|               | D1881N              | 101           |     |
|               | E1886Q              | 42            |     |
|               | I1988Afs90*         | 42            |     |
|               |                     | T62I          | 110 |
|               |                     | T62N          | 112 |
|               | K65E                | 113           |     |
|               | F160C               | 110           |     |
|               | I162M               | 141           |     |
|               | L253P               | 75            |     |
|               | D255G               | 113           |     |
|               | T271I               | 151           |     |
|               | Y272H               | 110           |     |
|               | H278R               | 150           |     |
|               | R414C               | 147           |     |

**SPTBN2**

|                  |                    |
|------------------|--------------------|
| R437W            | 110                |
| R437Q            | 110, 144, 145      |
| R437G            | 111                |
| T472M            | 140                |
| R480W            | 107, 108, 109, 143 |
| F515L            | 152                |
| E532_M544del     | 75                 |
| K551_Q1426del    | 112                |
| C627*            | 105                |
| L629_R634delinsW | 75                 |
| R721S            | 148                |
| T820M            | 148                |
| E870del          | 142                |
| R883L            | 141                |
| T955Sfs*120      | 149                |
| W2065*           | 110                |
| c.6375-1G>C      | 146                |

**SPTBN4**

|             |     |
|-------------|-----|
| R246P       | 160 |
| N384Qfs*17  | 160 |
| L417Yfs*5   | 160 |
| R504Q       | 115 |
| Q533*       | 158 |
| Q605*       | 115 |
| W903*       | 115 |
| D1126Tfs*39 | 160 |
| H1132Tfs*39 | 162 |
| Q1274*      | 115 |
| Q1277Rfs*4  | 115 |
| c.3949-1G>A | 159 |
| R2006*      | 161 |
| A2145T      | 163 |
| R2435C      | 115 |
| A2485Lfs*31 | 115 |
